# Supplementary material for: Omega-6 highly unsaturated fatty acids in Leydig cells facilitate male sex hormone production
Source: PubMed Central journal article supplement (PMC9492697; doi:10.1038/s42003-022-03972-y), 2022-09-21
Supplement: 42003_2022_3972_MOESM2_ESM.pdf [file 42003_2022_3972_MOESM2_ESM.pdf]

## Description of Additional Supplementary Files

**File name:** Supplementary Data 1

**Description:** The source data for graphs in the main figures.

**File name:** Supplementary Video 1

**Description:** Motility of sperms from FADS2<sup>+/+</sup> mice.

**File name:** Supplementary Video 2

**Description:** Motility of sperms from FADS2<sup>-/-</sup> mice.
